# Supplementary material for: Electrocatalyst Derived from NiCu–MOF Arrays on Graphene Oxide Modified Carbon Cloth for Water Splitting
Source: MDPI journal article supplement (doi:10.3390/inorganics10040053), 2022-04-13
Supplement: s1 [file s1]

## Supporting Information

### Electrocatalyst Derived from NiCu-MOFs arrays on Graphene Oxide Modified Carbon Cloth for Water Splitting

Lisha Jia, Pawel Wagner\*, Jun Chen\*

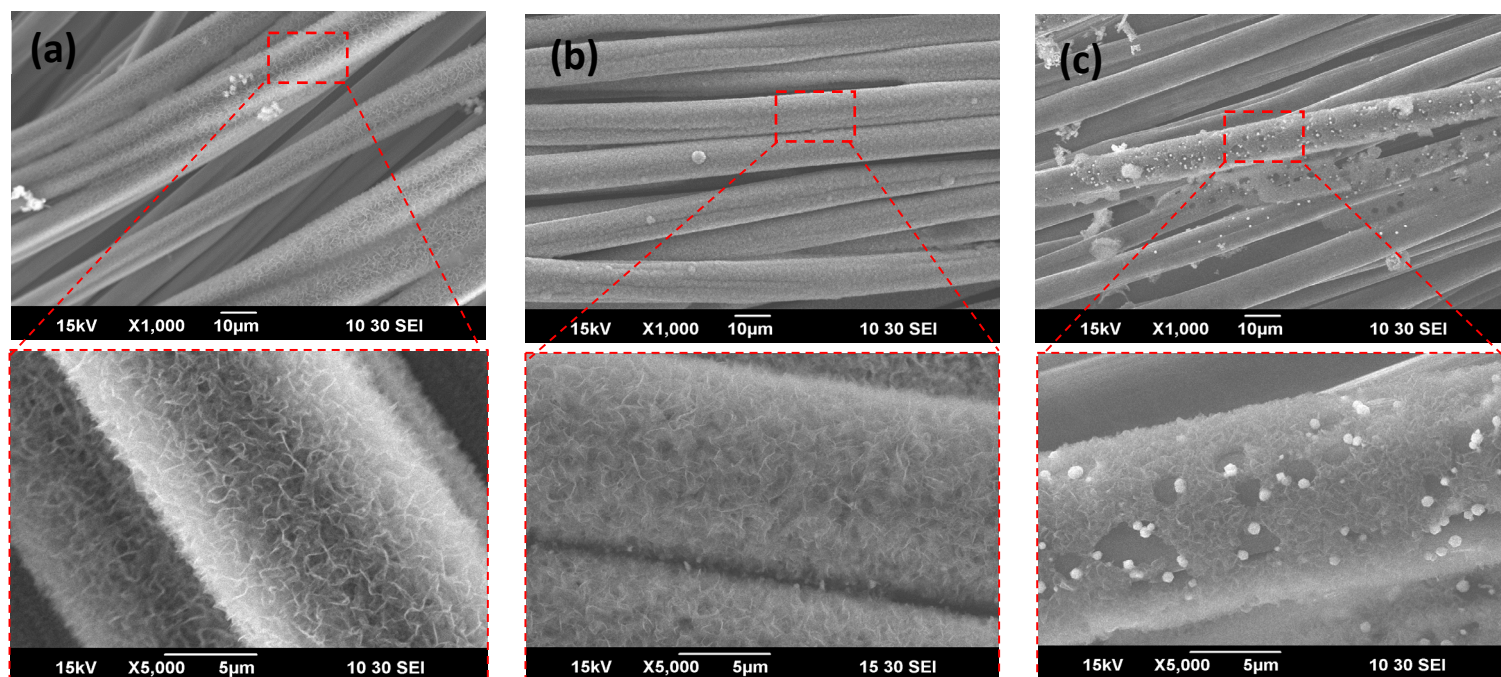

Figure S1. SEM images of NiCu-LDH-GO arrays prepared at different temperatures. (a,b,c) at 180, 200, 220 °C, respectively.

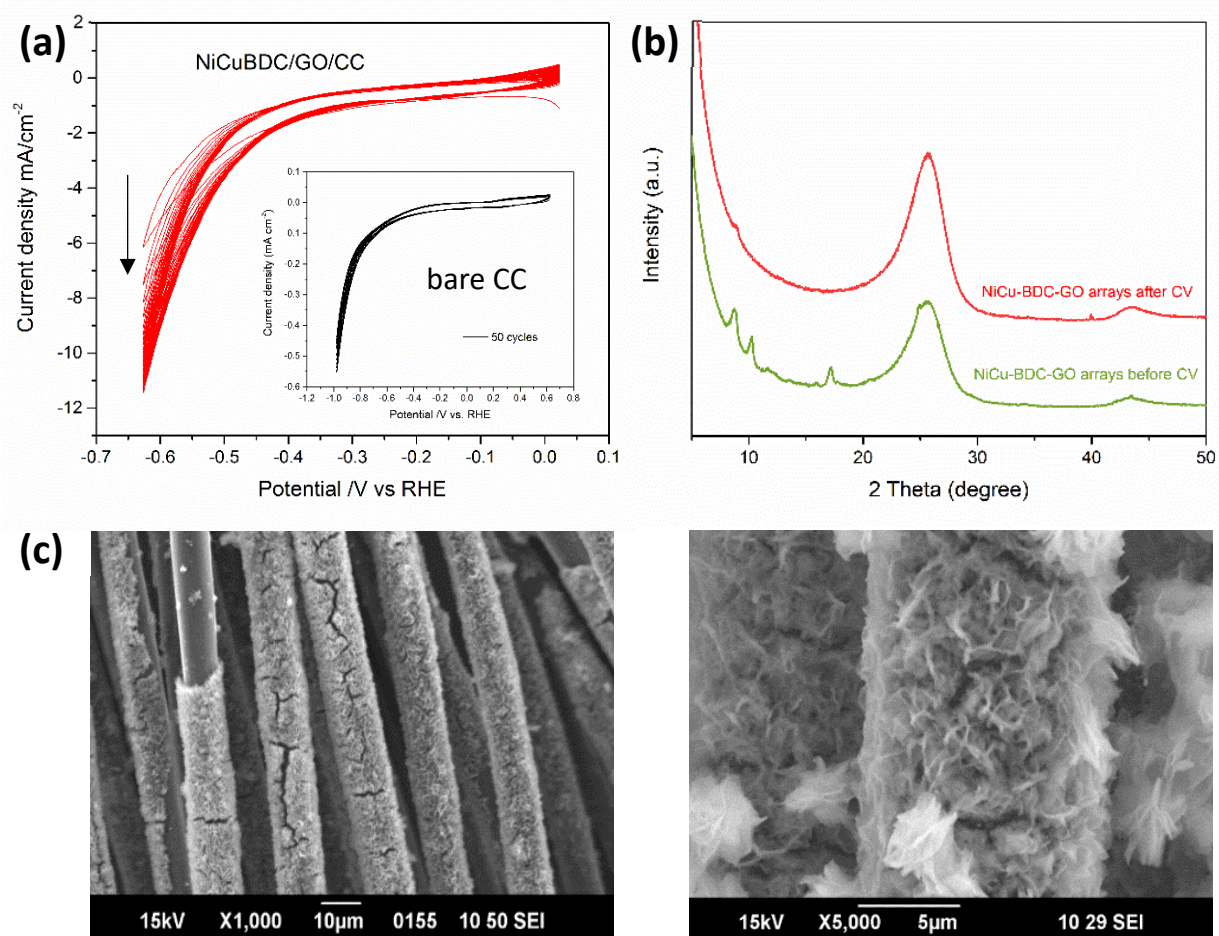

Figure S2. (a) 50 cycles CV of NiCu-MOFs arrays and bare CC in 0.1 M Na<sub>2</sub>SO<sub>4</sub>; (b) XRD of NiCu-MOFs arrays before and after CV testing; (c) SEM images of arrays after CV testing.

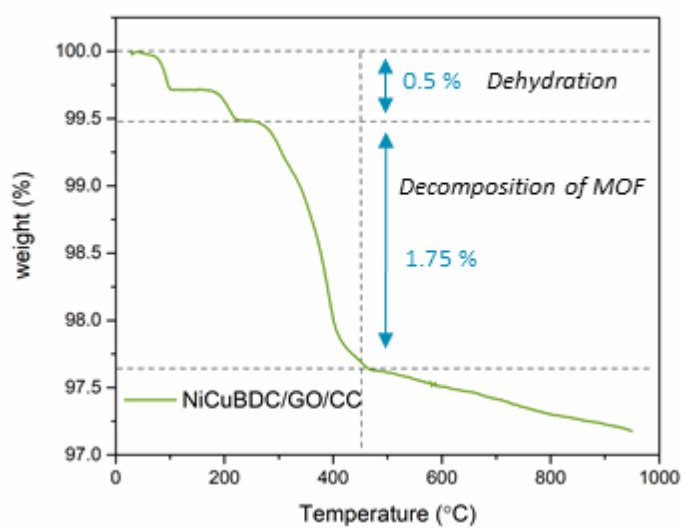

Figure S3. TGA of NiCu-MOFs in N<sub>2</sub> atmosphere

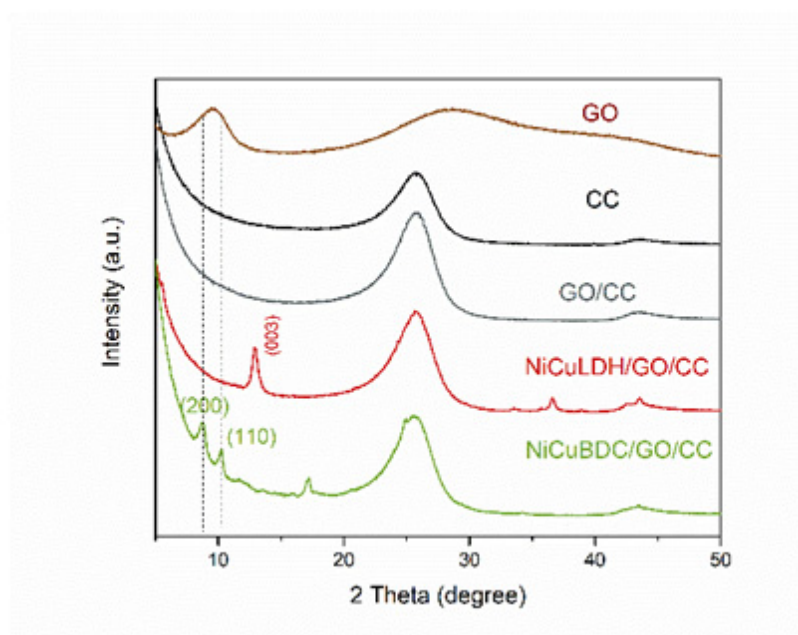

Figure S4. XRD of NiCu-LDH-GO-CC

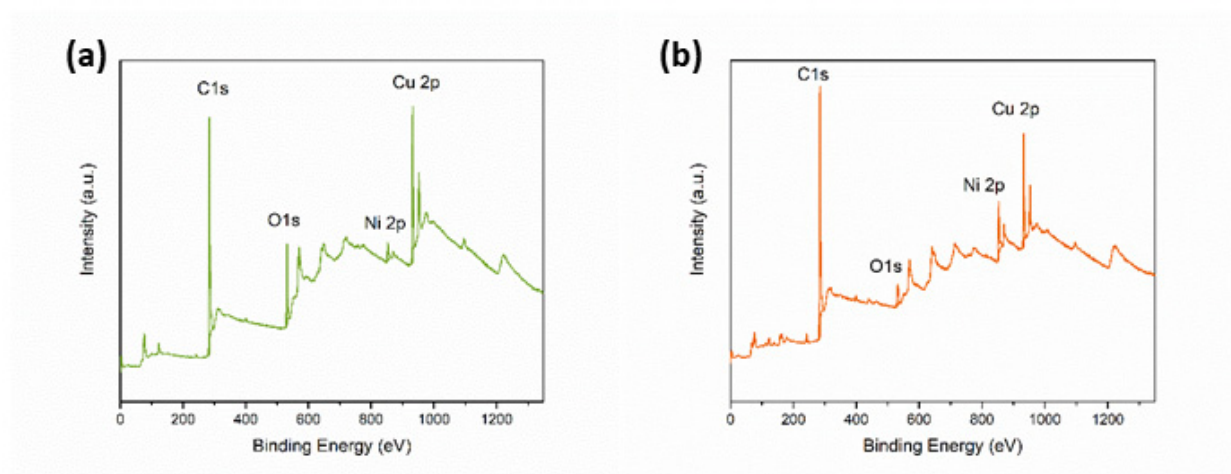

Figure S5. (a) XPS full spectrum of NiCu-BDC-GO-CC and (b) C-NiCu-BDC-GO-CC

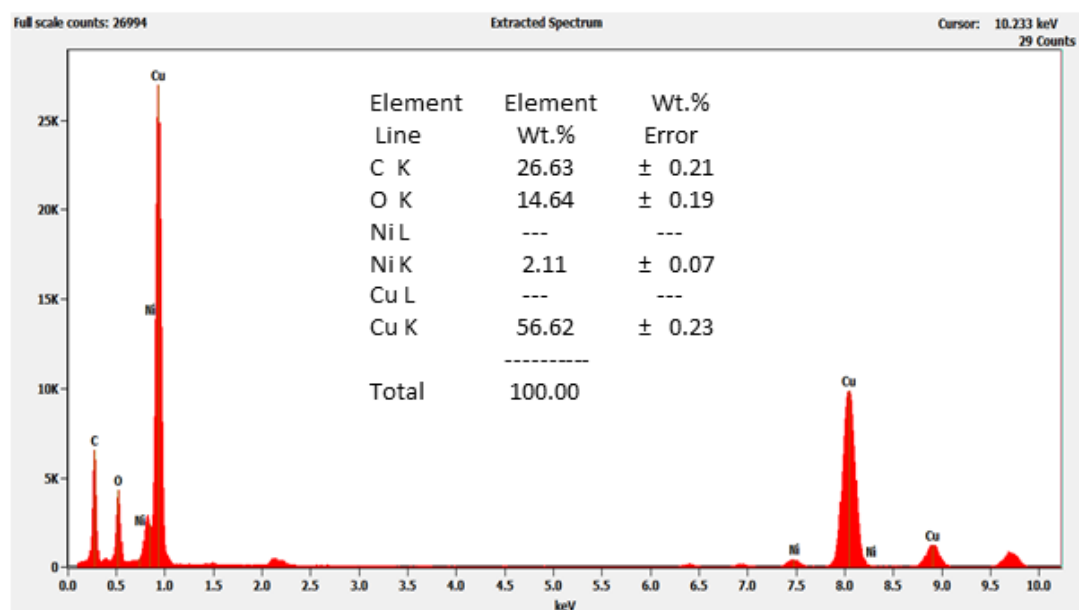

Figure S6. EDS of C-NiCu-BDC-GO-CC
